# Supplementary figures and images for: Recent and Ancient Signature of Balancing Selection around the S-Locus in Arabidopsis halleri and A. lyrata
Source: PubMed Central journal article supplement — Mol Biol Evol. 2012 Oct 27;30(2):435–47. doi: 10.1093/molbev/mss246 (PMC3548311; doi:10.1093/molbev/mss246), 2012-10-27

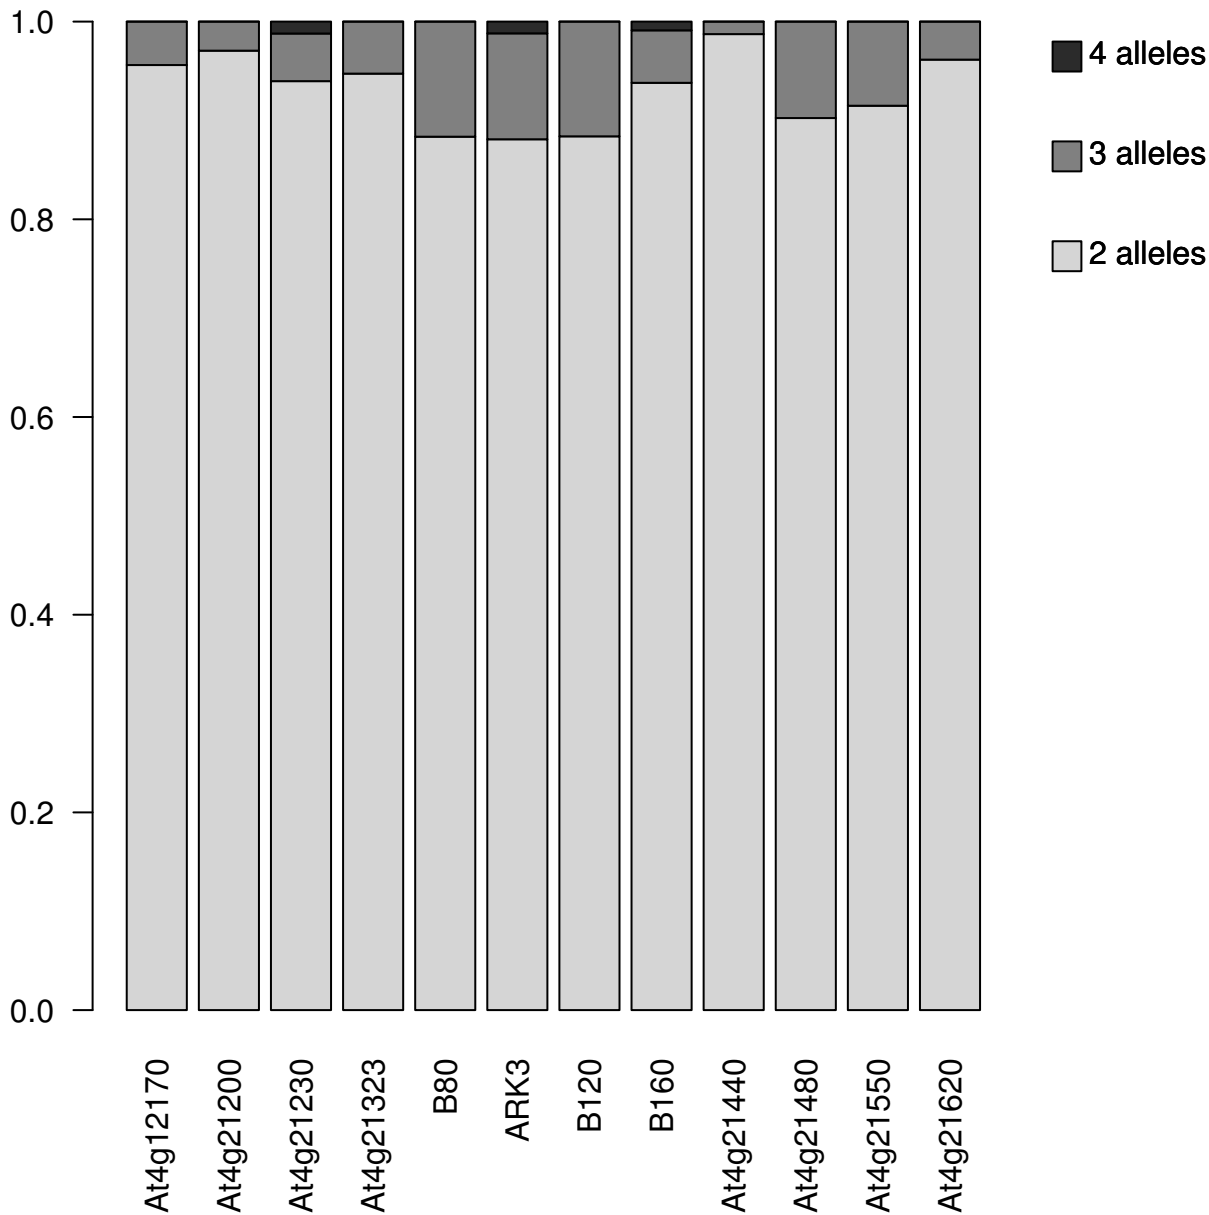

Supplement: supp_mss246_figureS1.pdf [file supp_mss246_figureS1.pdf]

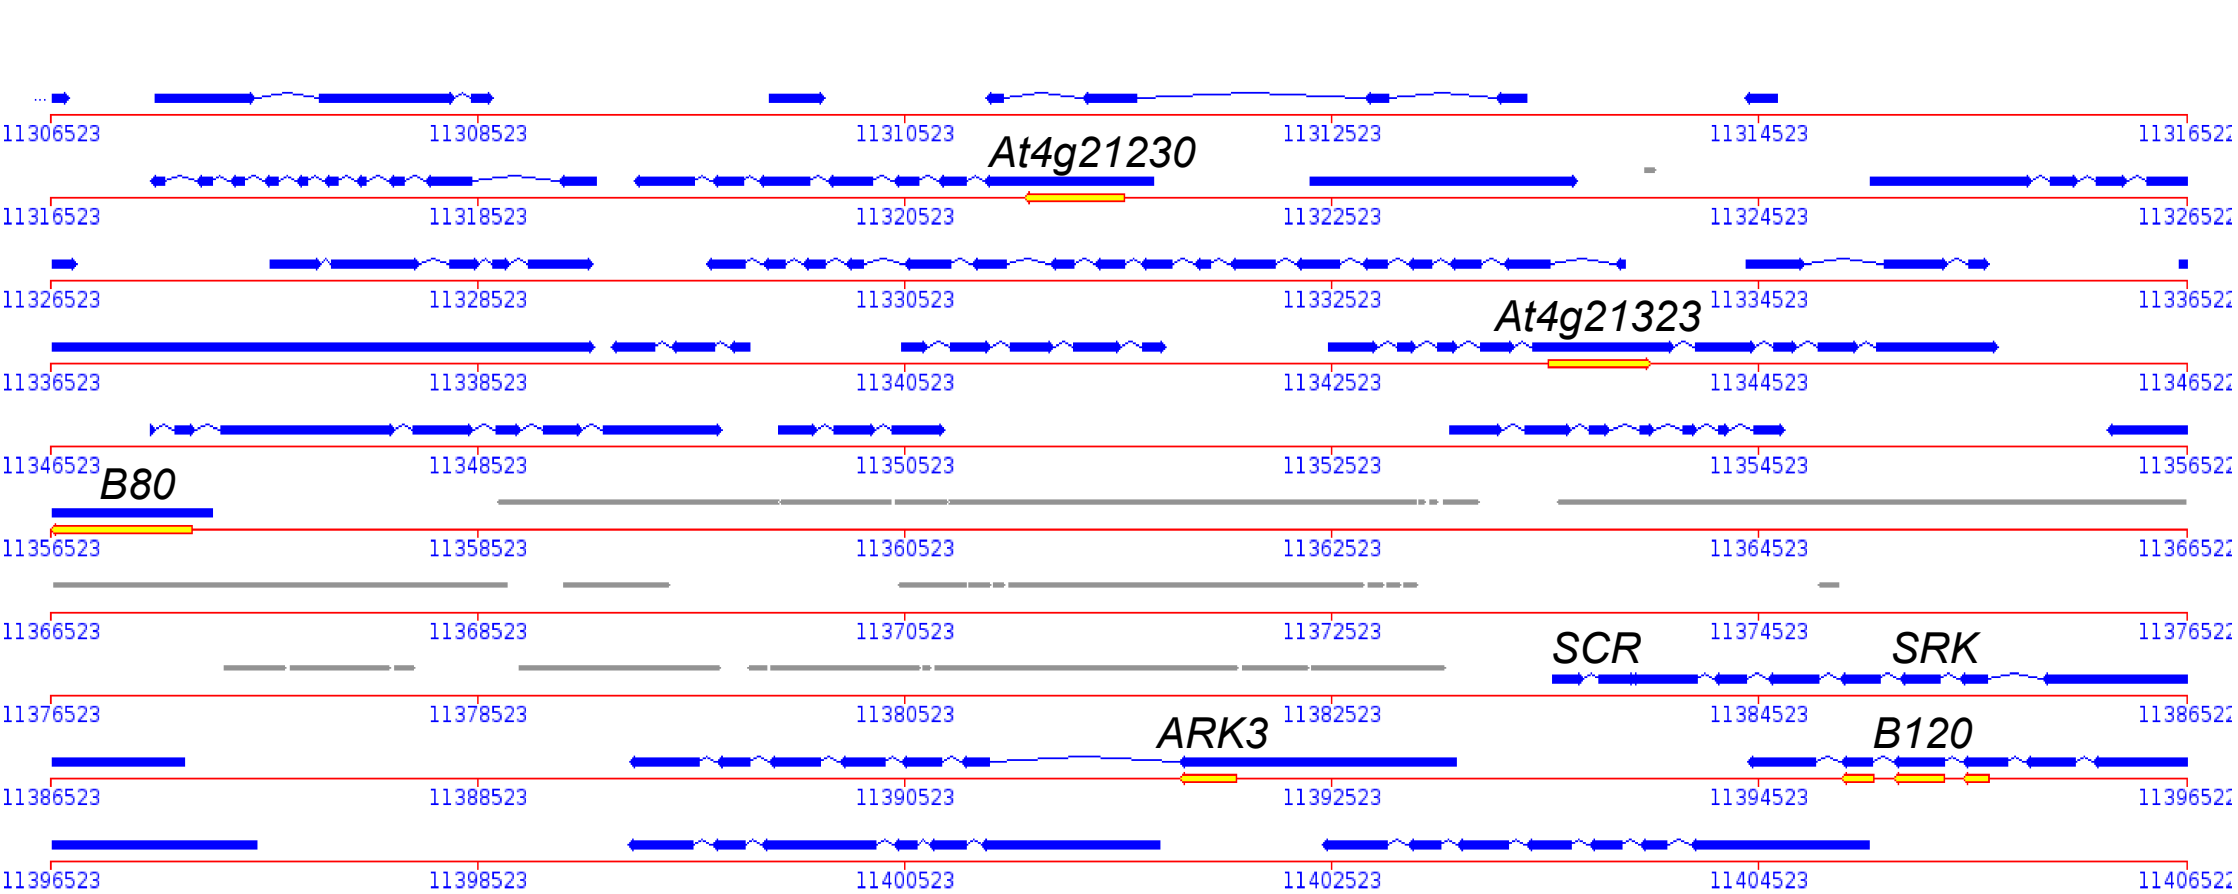

Supplement: supp_mss246_figureS2.pdf [file supp_mss246_figureS2.pdf]

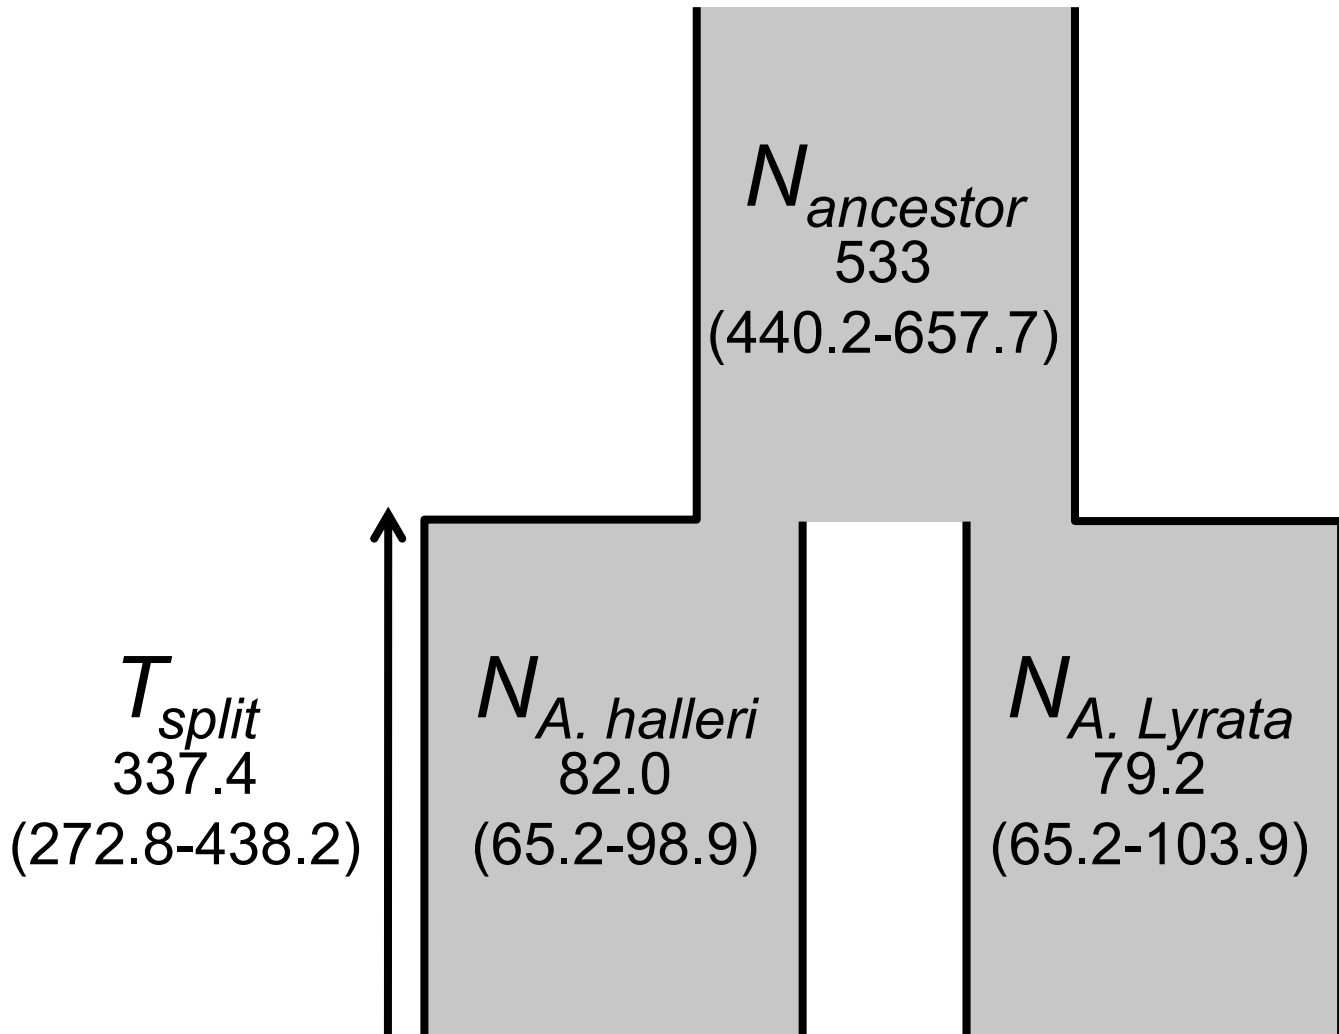

Supplement: supp_mss246_figureS3.pdf [file supp_mss246_figureS3.pdf]

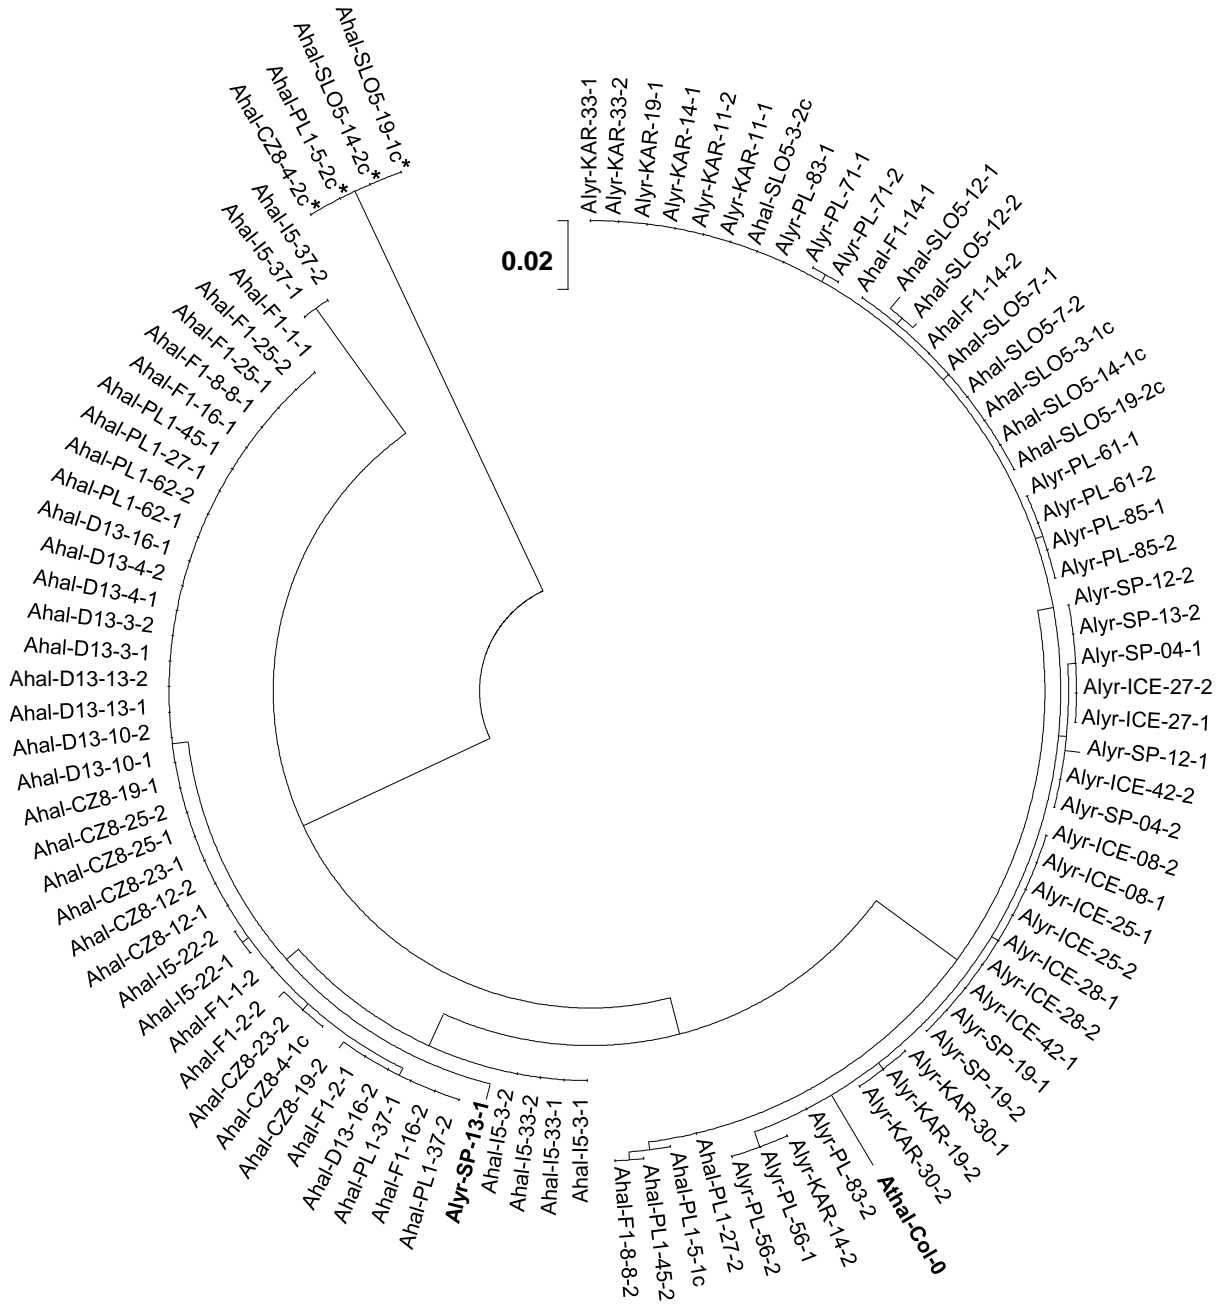

Supplement: supp_mss246_figureS4.pdf [file supp_mss246_figureS4.pdf]
